# Supplementary material for: A two-step DNA barcoding approach for delimiting moth species: moths of Dongling Mountain (Beijing, China) as a case study
Source: Springer Nature journal article supplement (doi:10.1038/s41598-018-32123-9), 2018-09-18
Supplement: 41598_2018_32123_MOESM2_ESM.pdf [file 41598_2018_32123_MOESM2_ESM.pdf]

## **A two-step DNA barcoding approach for delimiting moth species: moths of Dongling Mountain (Beijing, China) as a case study**

Qian Jin<sup>1†</sup>, Xi-Min Hu<sup>2†</sup>, Hui-Lin Han<sup>3</sup>, Fen Chen<sup>1</sup>, Wei-Jia Cai<sup>1</sup>, Qian-Qian Ruan<sup>1</sup>, Bo Liu<sup>1</sup>, Gui-Jie Luo<sup>1</sup>, Hao Wang<sup>1</sup>, Xu Liu<sup>1</sup>, Robert D. Ward<sup>4</sup>, Chun-Sheng Wu<sup>5</sup>, John-James Wilson<sup>6,7</sup> and Ai-Bing Zhang<sup>2\*</sup>

<sup>1</sup>*Suqian Institute of Agricultural Sciences, Jiangsu Academy of Agricultural Sciences, Suqian, Jiangsu 223800*

<sup>2</sup>*College of Life Sciences, Capital Normal University, Beijing 100048, China*

<sup>3</sup>*School of Forestry, Experiment Center, Northeast Forestry University, Haerbin 150040, China*

<sup>4</sup>*CSIRO National Research Collections Australia, GPO Box 1538, Hobart, Tasmania 7001, Australia*

<sup>5</sup>*Institute of Zoology, Chinese Academy of Sciences, 1 Beichen West Road, Chaoyang District, Beijing 100101, China*

<sup>6</sup>*School of Applied Sciences, Faculty of Computing, Engineering and Science, University of South Wales, Pontypridd, CF37 4AT, United Kingdom*

<sup>7</sup>*Department of Microbiology and Parasitology, Faculty of Medical Science, Naresuan University, Phitsanulok 65000, Thailand*

\*Corresponding: E-mail: [zhangab2008@gmail.com/zhangab2008@mail.cnu.edu.cn](mailto:zhangab2008@gmail.com/zhangab2008@mail.cnu.edu.cn)

†these authors contributed equally to this work

TableS1 Results of BIN analysis

| <b>OTU</b>    | <b>Mean</b> | <b>Max</b> | <b>Count</b> | <b>NN Dist</b> |
|---------------|-------------|------------|--------------|----------------|
| <b>OTU-1</b>  | 0           | 0          | 2            | 6.937394       |
| <b>OTU-2</b>  | 0           | 0          | 1            | 6.937394       |
| <b>OTU-3</b>  | 0           | 0          | 2            | 11.67513       |
| <b>OTU-4</b>  | 0.253807    | 0.507614   | 4            | 8.967851       |
| <b>OTU-5</b>  | 0           | 0          | 1            | 8.967851       |
| <b>OTU-6</b>  | 0.128918    | 0.338409   | 7            | 9.644671       |
| <b>OTU-7</b>  | 0           | 0          | 1            | 9.98308        |
| <b>OTU-8</b>  | 0           | 0          | 1            | 9.137056       |
| <b>OTU-9</b>  | 0           | 0          | 1            | 8.291032       |
| <b>OTU-10</b> | 0           | 0          | 1            | 5.752961       |
| <b>OTU-11</b> | 0           | 0          | 2            | 9.137056       |
| <b>OTU-12</b> | 0           | 0          | 1            | 6.937394       |
| <b>OTU-13</b> | 0.048344    | 0.169205   | 7            | 6.937394       |
| <b>OTU-14</b> | 0           | 0          | 3            | 5.752961       |
| <b>OTU-15</b> | 0.338409    | 0.507614   | 3            | 5.414552       |
| <b>OTU-16</b> | 0           | 0          | 1            | 7.952622       |
| <b>OTU-17</b> | 0           | 0          | 1            | 5.414552       |
| <b>OTU-18</b> | 0.044625    | 0.169205   | 14           | 8.793456       |
| <b>OTU-19</b> | 0           | 0          | 1            | 6.260575       |
| <b>OTU-20</b> | 0.305431    | 1.015228   | 43           | 5.583756       |
| <b>OTU-21</b> | 0           | 0          | 1            | 9.306261       |
| <b>OTU-22</b> | 0           | 0          | 1            | 5.076142       |
| <b>OTU-23</b> | 0           | 0          | 3            | 5.076142       |
| <b>OTU-24</b> | 0.101523    | 0.169205   | 5            | 6.598984       |
| <b>OTU-25</b> | 0.197406    | 0.338409   | 4            | 6.598984       |
| <b>OTU-26</b> | 0           | 0          | 1            | 6.091371       |
| <b>OTU-27</b> | 0           | 0          | 2            | 6.768189       |
| <b>OTU-28</b> | 0.180485    | 0.338409   | 10           | 10.15228       |
| <b>OTU-29</b> | 0           | 0          | 1            | 6.091371       |
| <b>OTU-30</b> | 0.084602    | 0.169205   | 4            | 5.414552       |
| <b>OTU-31</b> | 0.225606    | 0.338409   | 3            | 7.275804       |
| <b>OTU-32</b> | 0.225606    | 0.338409   | 3            | 8.291032       |
| <b>OTU-33</b> | 0.128918    | 0.338409   | 7            | 8.629441       |
| <b>OTU-34</b> | 0           | 0          | 8            | 5.414552       |
| <b>OTU-35</b> | 0.966005    | 1.692047   | 11           | 10.15228       |
| <b>OTU-36</b> | 0           | 0          | 1            | 8.967851       |
| <b>OTU-37</b> | 0           | 0          | 1            | 8.967851       |
| <b>OTU-38</b> | 0           | 0          | 1            | 9.644671       |
| <b>OTU-39</b> | 0           | 0          | 1            | 10.15228       |
| <b>OTU-40</b> | 0           | 0          | 1            | 7.952622       |
| <b>OTU-41</b> | 0.203046    | 0.507614   | 5            | 10.49069       |

|               |          |          |    |          |
|---------------|----------|----------|----|----------|
| <b>OTU-42</b> | 0        | 0        | 1  | 9.98308  |
| <b>OTU-43</b> | 0        | 0        | 1  | 8.291032 |
| <b>OTU-44</b> | 0.277979 | 0.507614 | 8  | 2.368866 |
| <b>OTU-45</b> | 0        | 0        | 1  | 7.275804 |
| <b>OTU-46</b> | 0.338409 | 0.338409 | 2  | 7.783418 |
| <b>OTU-47</b> | 0        | 0        | 1  | 7.614213 |
| <b>OTU-48</b> | 0.846024 | 0.846024 | 2  | 7.783418 |
| <b>OTU-49</b> | 0        | 0        | 4  | 2.368866 |
| <b>OTU-50</b> | 0        | 0        | 1  | 7.275804 |
| <b>OTU-51</b> | 0        | 0        | 1  | 6.598984 |
| <b>OTU-52</b> | 0.564016 | 0.846024 | 3  | 6.937394 |
| <b>OTU-53</b> | 0.084602 | 0.169205 | 4  | 6.937394 |
| <b>OTU-54</b> | 0        | 0        | 1  | 9.644671 |
| <b>OTU-55</b> | 0        | 0        | 1  | 8.460238 |
| <b>OTU-56</b> | 0        | 0        | 1  | 9.644671 |
| <b>OTU-57</b> | 0.338409 | 0.338409 | 2  | 9.644671 |
| <b>OTU-58</b> | 0.042301 | 0.169205 | 8  | 8.629441 |
| <b>OTU-59</b> | 0.564016 | 0.676819 | 3  | 6.598984 |
| <b>OTU-60</b> | 0        | 0        | 1  | 10.6599  |
| <b>OTU-61</b> | 0        | 0        | 1  | 8.460238 |
| <b>OTU-62</b> | 0        | 0        | 1  | 7.783418 |
| <b>OTU-63</b> | 0        | 0        | 1  | 7.275804 |
| <b>OTU-64</b> | 0        | 0        | 4  | 11.67513 |
| <b>OTU-65</b> | 0        | 0        | 2  | 7.952622 |
| <b>OTU-66</b> | 0.846024 | 0.846024 | 2  | 8.291032 |
| <b>OTU-67</b> | 0        | 0        | 3  | 9.306261 |
| <b>OTU-68</b> | 0        | 0        | 1  | 10.99831 |
| <b>OTU-69</b> | 0        | 0        | 1  | 9.475465 |
| <b>OTU-70</b> | 0.090243 | 0.169205 | 6  | 9.475465 |
| <b>OTU-71</b> | 0.136551 | 0.507614 | 19 | 10.6599  |
| <b>OTU-72</b> | 0        | 0        | 1  | 3.384095 |
| <b>OTU-73</b> | 0        | 0        | 1  | 3.384095 |
| <b>OTU-74</b> | 0        | 0        | 1  | 8.798646 |
| <b>OTU-75</b> | 0.148256 | 0.507614 | 15 | 5.245347 |
| <b>OTU-76</b> | 0        | 0        | 1  | 7.275804 |
| <b>OTU-77</b> | 0.112803 | 0.169205 | 3  | 8.121827 |
| <b>OTU-78</b> | 0        | 0        | 4  | 6.952965 |
| <b>OTU-79</b> | 0        | 0        | 1  | 3.384095 |
| <b>OTU-80</b> | 0.73322  | 2.199662 | 6  | 7.614213 |
| <b>OTU-81</b> | 0        | 0        | 1  | 5.752961 |
| <b>OTU-82</b> | 0        | 0        | 1  | 8.460238 |
| <b>OTU-83</b> | 0        | 0        | 1  | 7.614213 |
| <b>OTU-84</b> | 0        | 0        | 2  | 8.629441 |
| <b>OTU-85</b> | 0        | 0        | 1  | 5.245347 |

|                |          |          |   |          |
|----------------|----------|----------|---|----------|
| <b>OTU-86</b>  | 0        | 0        | 1 | 8.967851 |
| <b>OTU-87</b>  | 0        | 0        | 1 | 8.629441 |
| <b>OTU-88</b>  | 0        | 0        | 1 | 7.614213 |
| <b>OTU-89</b>  | 0        | 0        | 1 | 8.460238 |
| <b>OTU-90</b>  | 0.084602 | 0.169205 | 4 | 8.798646 |
| <b>OTU-91</b>  | 0        | 0        | 2 | 6.260575 |
| <b>OTU-92</b>  | 0        | 0        | 3 | 7.445008 |
| <b>OTU-93</b>  | 0        | 0        | 2 | 7.275804 |
| <b>OTU-94</b>  | 0.146886 | 0.338409 | 4 | 6.952965 |
| <b>OTU-95</b>  | 0        | 0        | 1 | 7.614213 |
| <b>OTU-96</b>  | 0        | 0        | 1 | 9.306261 |
| <b>OTU-97</b>  | 0        | 0        | 1 | 8.798646 |
| <b>OTU-98</b>  | 0        | 0        | 1 | 10.49069 |
| <b>OTU-99</b>  | 0        | 0        | 1 | 8.967851 |
| <b>OTU-100</b> | 0        | 0        | 2 | 8.629441 |
| <b>OTU-101</b> | 0        | 0        | 1 | 10.32149 |
| <b>OTU-102</b> | 0        | 0        | 1 | 9.98308  |
| <b>OTU-103</b> | 0        | 0        | 1 | 11.50592 |
| <b>OTU-104</b> | 0.338409 | 0.338409 | 2 | 9.98308  |
| <b>OTU-105</b> | 0        | 0        | 2 | 8.460238 |
| <b>OTU-106</b> | 0        | 0        | 1 | 9.644671 |
| <b>OTU-107</b> | 0        | 0        | 1 | 8.798646 |
| <b>OTU-108</b> | 0        | 0        | 1 | 8.460238 |
| <b>OTU-109</b> | 0        | 0        | 1 | 8.798646 |
| <b>OTU-110</b> | 0        | 0        | 2 | 8.798646 |
| <b>OTU-111</b> | 0        | 0        | 1 | 9.137056 |
| <b>OTU-112</b> | 0.203046 | 0.507614 | 5 | 5.922166 |
| <b>OTU-113</b> | 0        | 0        | 3 | 7.106599 |
| <b>OTU-114</b> | 0        | 0        | 2 | 8.460238 |

---

TableS2 Intra-and interspecific divergences of different sequences

| Genes            | Type of distance | Mean   | Min | Max    | Std    | Number | Number of Min Intert< Max Intra | Rate (%) |
|------------------|------------------|--------|-----|--------|--------|--------|---------------------------------|----------|
| CO1              | Intra-distance   | 0.0026 | 0   | 0.0102 | 0.0026 | 277    | 642                             | 53.15    |
|                  | Inter-distance   | 0.0367 | 0   | 0.0975 | 0.0364 | 1208   |                                 |          |
| CO2              | Intra-distance   | 0.0021 | 0   | 0.0080 | 0.0021 | 277    | 642                             | 53.15    |
|                  | Inter-distance   | 0.0319 | 0   | 0.0935 | 0.0334 | 1208   |                                 |          |
| 28S              | Intra-distance   | 0.0013 | 0   | 0.0051 | 0.0012 | 277    | 689                             | 57.04    |
|                  | Inter-distance   | 0.0058 | 0   | 0.0207 | 0.0055 | 1208   |                                 |          |
| EF-1a            | Intra-distance   | 0.0017 | 0   | 0.0401 | 0.0046 | 277    | 1134                            | 93.87    |
|                  | Inter-distance   | 0.0133 | 0   | 0.0490 | 0.0168 | 1208   |                                 |          |
| Wgl              | Intra-distance   | 0.0034 | 0   | 0.0268 | 0.0035 | 277    | 742                             | 61.42    |
|                  | Inter-distance   | 0.0140 | 0   | 0.0579 | 0.0153 | 1208   |                                 |          |
| mtDNA            | Intra-distance   | 0.0024 | 0   | 0.0083 | 0.0023 | 277    | 642                             | 53.15    |
|                  | Inter-distance   | 0.0348 | 0   | 0.0935 | 0.0351 | 1208   |                                 |          |
| nDNA             | Intra-distance   | 0.0019 | 0   | 0.0197 | 0.0022 | 277    | 866                             | 71.69    |
|                  | Inter-distance   | 0.0100 | 0   | 0.0357 | 0.0103 | 1208   |                                 |          |
| 5 genes combined | Intra-distance   | 0.0021 | 0   | 0.0126 | 0.0016 | 277    | 642                             | 53.15    |
|                  | Inter-distance   | 0.0186 | 0   | 0.0506 | 0.0185 | 1208   |                                 |          |

TableS3 Posterior probabilities for different data sets without rjMCMC

| Nodes of the<br>species tree | Posterior probabilities ( $P=\tau < 0.0002$ ) for different data sets |         |         |
|------------------------------|-----------------------------------------------------------------------|---------|---------|
|                              | 5 loci                                                                | n DNA P | mt DNA  |
| spnode20                     | 0.00000                                                               | 0.00000 | 0.24708 |
| spnode21                     | 0.00000                                                               | 0.00000 | 0.27282 |
| spnode22                     | 0.00000                                                               | 0.00000 | 0.31399 |
| spnode23                     | 0.00316                                                               | 0.02559 | 0.59826 |
| spnode24                     | 0.73903                                                               | 0.74681 | 0.97577 |
| spnode25                     | 0.00000                                                               | 0.00000 | 0.42048 |
| spnode26                     | 1.00000                                                               | 0.99446 | 0.98885 |
| spnode27                     | 1.00000                                                               | 0.99977 | 0.99719 |
| spnode28                     | 1.00000                                                               | 1.00000 | 0.99940 |
| spnode29                     | 1.00000                                                               | 0.99999 | 0.99975 |
| spnode30                     | 1.00000                                                               | 0.99810 | 0.99706 |
| spnode31                     | 1.00000                                                               | 0.99961 | 0.99991 |
| spnode32                     | 0.00000                                                               | 0.00000 | 0.29423 |
| spnode33                     | 0.00000                                                               | 0.00000 | 0.37015 |
| spnode34                     | 0.00003                                                               | 0.00037 | 0.53012 |
| spnode35                     | 0.00130                                                               | 0.00864 | 0.72495 |
| spnode36                     | 0.03880                                                               | 0.13163 | 0.91070 |
| spnode37                     | 0.02289                                                               | 0.07010 | 0.75172 |

TableS4 Taxon information, detailed sampling sites and GenBank accession numbers.

| Family    | Subfamily    | Species                          | Specimen ID  | CO1      | Locality |
|-----------|--------------|----------------------------------|--------------|----------|----------|
| Crambidae | Pyraustinae  | <i>Anania verbascalis</i>        | DLS100714092 | KJ183366 | DLS      |
| Crambidae | Pyraustinae  | <i>Anania verbascalis</i>        | DLS100714336 | KJ183367 | DLS      |
| Crambidae | Pyraustinae  | <i>Circobotys heterogenalis</i>  | DLS100714158 | KJ183368 | DLS      |
| Crambidae | Pyraustinae  | <i>Pseudebulea fentoni</i>       | DLS100714130 | KJ183369 | DLS      |
| Crambidae | Pyraustinae  | <i>Pseudebulea fentoni</i>       | DLS100714287 | KJ183370 | DLS      |
| Crambidae | Pyraustinae  | <i>Pyrausta sp</i>               | DLS100714140 | KJ183371 | DLS      |
| Crambidae | Pyraustinae  | <i>Pyrausta sp</i>               | DLS100714213 | KJ183372 | DLS      |
| Crambidae | Pyraustinae  | <i>Pyrausta sp</i>               | DLS100714342 | KJ183373 | DLS      |
| Crambidae | Pyraustinae  | <i>Pyrausta sp</i>               | DLS100714350 | KJ183374 | DLS      |
| Crambidae | Pyraustinae  | <i>Sitochroa verticalis</i>      | DLS100714347 | KJ183375 | DLS      |
| Crambidae | Spilomelinae | <i>Diaphania quadrimaculalis</i> | DLS100714075 | KJ183376 | DLS      |
| Crambidae | Spilomelinae | <i>Diaphania quadrimaculalis</i> | DLS100714167 | KJ183377 | DLS      |
| Crambidae | Spilomelinae | <i>Diaphania quadrimaculalis</i> | DLS100714177 | KJ183378 | DLS      |
| Crambidae | Spilomelinae | <i>Diaphania quadrimaculalis</i> | DLS100714233 | KJ183379 | DLS      |
| Crambidae | Spilomelinae | <i>Diaphania quadrimaculalis</i> | DLS100714302 | KJ183380 | DLS      |
| Crambidae | Spilomelinae | <i>Diaphania quadrimaculalis</i> | DLS100714346 | KJ183381 | DLS      |
| Crambidae | Spilomelinae | <i>Diaphania quadrimaculalis</i> | DLS100714229 | KJ183382 | DLS      |
| Crambidae | Spilomelinae | <i>Mecyna flavalis</i>           | DLS100714227 | KJ183383 | DLS      |
| Erebidae  | Arctiinae    | <i>Chionarctia nivea</i>         | DLS100714127 | KJ183387 | DLS      |
| Erebidae  | Arctiinae    | <i>Eilema ussurica</i>           | DLS100714335 | KJ183388 | DLS      |
| Erebidae  | Arctiinae    | <i>Epatolmis caesarea</i>        | DLS100714156 | KJ183389 | DLS      |
| Erebidae  | Arctiinae    | <i>Miltochrista striata</i>      | DLS100714093 | KJ183390 | DLS      |
| Erebidae  | Arctiinae    | <i>Miltochrista striata</i>      | DLS100714321 | KJ183391 | DLS      |
| Erebidae  | Arctiinae    | <i>Pericallia matronula</i>      | DLS100714055 | KJ183392 | DLS      |
| Erebidae  | Arctiinae    | <i>Rhyparioides amurensis</i>    | DLS100714049 | KJ183393 | DLS      |
| Erebidae  | Arctiinae    | <i>Rhyparioides amurensis</i>    | DLS100714050 | KJ183394 | DLS      |
| Erebidae  | Arctiinae    | <i>Rhyparioides amurensis</i>    | DLS100714051 | KJ183395 | DLS      |
| Erebidae  | Arctiinae    | <i>Rhyparioides amurensis</i>    | DLS100714052 | KJ183396 | DLS      |
| Erebidae  | Arctiinae    | <i>Rhyparioides amurensis</i>    | DLS100714053 | KJ183397 | DLS      |
| Erebidae  | Arctiinae    | <i>Rhyparioides amurensis</i>    | DLS100714054 | KJ183398 | DLS      |
| Erebidae  | Arctiinae    | <i>Rhyparioides amurensis</i>    | DLS100714243 | KJ183399 | DLS      |
| Erebidae  | Arctiinae    | <i>Spilosoma lubricipeda</i>     | DLS100714060 | KJ183400 | DLS      |
| Erebidae  | Arctiinae    | <i>Spilosoma lubricipeda</i>     | DLS100714095 | KJ183401 | DLS      |
| Erebidae  | Arctiinae    | <i>Spilosoma lubricipeda</i>     | DLS100714305 | KJ183402 | DLS      |
| Erebidae  | Arctiinae    | <i>Stigmatophora micans</i>      | DLS100714218 | KJ183405 | DLS      |
| Erebidae  | Arctiinae    | <i>Stigmatophora micans</i>      | DLS100714319 | KJ183403 | DLS      |
| Erebidae  | Arctiinae    | <i>Stigmatophora micans</i>      | DLS100714329 | KJ183404 | DLS      |
| Erebidae  | Arctiinae    | <i>Stigmatophora rhodophila</i>  | DLS100714352 | KJ183406 | DLS      |
| Erebidae  | Arctiinae    | <i>Asura unipuncta mekala</i>    | DLS100714067 | KJ183407 | DLS      |
| Erebidae  | Lymantrinae  | <i>Euproctis niphonis</i>        | DLS100714139 | KJ183488 | DLS      |
| Erebidae  | Lymantrinae  | <i>Euproctis niphonis</i>        | DLS100714157 | KJ183489 | DLS      |

|          |             |                           |              |          |     |
|----------|-------------|---------------------------|--------------|----------|-----|
| Erebidae | Lymantrinae | <i>Euproctis niphonis</i> | DLS100714193 | KJ183490 | DLS |
| Erebidae | Lymantrinae | <i>Euproctis niphonis</i> | DLS100714194 | KJ183491 | DLS |
| Erebidae | Lymantrinae | <i>Euproctis niphonis</i> | DLS100714198 | KJ183492 | DLS |
| Erebidae | Lymantrinae | <i>Euproctis niphonis</i> | DLS100714220 | KJ183493 | DLS |
| Erebidae | Lymantrinae | <i>Euproctis niphonis</i> | DLS100714222 | KJ183494 | DLS |
| Erebidae | Lymantrinae | <i>Euproctis niphonis</i> | DLS100714252 | KJ183495 | DLS |
| Erebidae | Lymantrinae | <i>Euproctis niphonis</i> | DLS100714284 | KJ183496 | DLS |
| Erebidae | Lymantrinae | <i>Euproctis niphonis</i> | DLS100714292 | KJ183497 | DLS |
| Erebidae | Lymantrinae | <i>Euproctis niphonis</i> | DLS100714308 | KJ183498 | DLS |
| Erebidae | Lymantrinae | <i>Euproctis niphonis</i> | DLS100714309 | KJ183499 | DLS |
| Erebidae | Lymantrinae | <i>Euproctis niphonis</i> | DLS100714315 | KJ183500 | DLS |
| Erebidae | Lymantrinae | <i>Euproctis niphonis</i> | DLS100714340 | KJ183501 | DLS |
| Erebidae | Lymantrinae | <i>Dasychira tristis</i>  | DLS100714113 | MH122657 | DLS |
| Erebidae | Erebinae    | <i>Mocis ancilla</i>      | DLS100714196 | KJ183426 | DLS |
| Erebidae | Hypeninae   | <i>Hypena sp.1</i>        | DLS100714062 | KF797525 | DLS |
| Erebidae | Hypeninae   | <i>Hypena sp.1</i>        | DLS100714076 | KF797526 | DLS |
| Erebidae | Hypeninae   | <i>Hypena sp.1</i>        | DLS100714079 | KF797527 | DLS |
| Erebidae | Hypeninae   | <i>Hypena sp.1</i>        | DLS100714081 | KF797528 | DLS |
| Erebidae | Hypeninae   | <i>Hypena sp.1</i>        | DLS100714089 | KF797529 | DLS |
| Erebidae | Hypeninae   | <i>Hypena sp.1</i>        | DLS100714096 | KF797530 | DLS |
| Erebidae | Hypeninae   | <i>Hypena sp.1</i>        | DLS100714105 | KF797531 | DLS |
| Erebidae | Hypeninae   | <i>Hypena sp.1</i>        | DLS100714110 | KF797532 | DLS |
| Erebidae | Hypeninae   | <i>Hypena sp.2</i>        | DLS100714111 | KF797533 | DLS |
| Erebidae | Hypeninae   | <i>Hypena sp.3</i>        | DLS100714117 | KF797534 | DLS |
| Erebidae | Hypeninae   | <i>Hypena sp.3</i>        | DLS100714131 | KF797535 | DLS |
| Erebidae | Hypeninae   | <i>Hypena sp.4</i>        | DLS100714123 | KF797536 | DLS |
| Erebidae | Hypeninae   | <i>Hypena sp.5</i>        | DLS100714128 | KF797537 | DLS |
| Erebidae | Hypeninae   | <i>Hypena sp.5</i>        | DLS100714144 | KF797538 | DLS |
| Erebidae | Hypeninae   | <i>Hypena sp.5</i>        | DLS100714154 | KF797539 | DLS |
| Erebidae | Hypeninae   | <i>Hypena sp.5</i>        | DLS100714169 | KF797540 | DLS |
| Erebidae | Hypeninae   | <i>Hypena sp.5</i>        | DLS100714179 | KF797541 | DLS |
| Erebidae | Hypeninae   | <i>Hypena sp.5</i>        | DLS100714207 | KF797542 | DLS |
| Erebidae | Hypeninae   | <i>Hypena sp.5</i>        | DLS100714208 | KF797543 | DLS |
| Erebidae | Hypeninae   | <i>Hypena sp.5</i>        | DLS100714214 | KF797544 | DLS |
| Erebidae | Hypeninae   | <i>Hypena sp.5</i>        | DLS100714231 | KF797545 | DLS |
| Erebidae | Hypeninae   | <i>Hypena sp.5</i>        | DLS100714244 | KF797546 | DLS |
| Erebidae | Hypeninae   | <i>Hypena sp.5</i>        | DLS100714247 | KF797547 | DLS |
| Erebidae | Hypeninae   | <i>Hypena sp.5</i>        | DLS100714253 | KF797548 | DLS |
| Erebidae | Hypeninae   | <i>Hypena sp.5</i>        | DLS100714257 | KF797549 | DLS |
| Erebidae | Hypeninae   | <i>Hypena sp.5</i>        | DLS100714261 | KF797550 | DLS |
| Erebidae | Hypeninae   | <i>Hypena sp.5</i>        | DLS100714266 | KF797551 | DLS |
| Erebidae | Hypeninae   | <i>Hypena sp.5</i>        | DLS100714279 | KF797552 | DLS |
| Erebidae | Hypeninae   | <i>Hypena sp.5</i>        | DLS100714281 | KF797553 | DLS |
| Erebidae | Hypeninae   | <i>Hypena sp.5</i>        | DLS100714314 | KF797554 | DLS |



|             |              |                              |              |          |     |
|-------------|--------------|------------------------------|--------------|----------|-----|
| Erebidae    | Hypeninae    | <i>Hypena sp.5</i>           | DLS100714328 | KF797555 | DLS |
| Erebidae    | Hypeninae    | <i>Hypena sp.5</i>           | DLS100714351 | KF797556 | DLS |
| Erebidae    | Hypeninae    | <i>Hypena sp.5</i>           | DLS100714181 | KF797557 | DLS |
| Erebidae    | Hypeninae    | <i>Hypena sp.6</i>           | DLS100714174 | KF797558 | DLS |
| Erebidae    | Hypeninae    | <i>Hypena sp.7</i>           | DLS100714176 | KF797559 | DLS |
| Erebidae    | Hypeninae    | <i>Hypena sp.7</i>           | DLS100714260 | KF797560 | DLS |
| Erebidae    | Hypeninae    | <i>Hypena squalida</i>       | DLS100714083 | KF797561 | DLS |
| Erebidae    | Hypeninae    | <i>Hypena squalida</i>       | DLS100714124 | KF797562 | DLS |
| Erebidae    | Hypeninae    | <i>Hypena squalida</i>       | DLS100714148 | KF797563 | DLS |
| Erebidae    | Hypeninae    | <i>Hypena squalida</i>       | DLS100714166 | KF797564 | DLS |
| Erebidae    | Hypeninae    | <i>Hypena squalida</i>       | DLS100714173 | KF797565 | DLS |
| Erebidae    | Hypeninae    | <i>Hypena squalida</i>       | DLS100714273 | KF797566 | DLS |
| Erebidae    | Hypeninae    | <i>Hypena squalida</i>       | DLS100714334 | KF797567 | DLS |
| Erebidae    | Hypeninae    | <i>Hypena rivuligera</i>     | BHS100704018 | KF797579 | BHS |
| Erebidae    | Hypeninae    | <i>Hypena stygiana</i>       | BHS100703072 | KF797576 | BHS |
| Erebidae    | Hypeninae    | <i>Hypena stygiana</i>       | BHS100703246 | KF797577 | BHS |
| Erebidae    | Hypeninae    | <i>Hypena stygiana</i>       | WLS100722081 | KF797578 | WLS |
| Erebidae    | Hypeninae    | <i>Hypena kengkalis</i>      | BHS100703096 | KF797569 | BHS |
| Erebidae    | Hypeninae    | <i>Hypena kengkalis</i>      | BHS100705124 | KF797568 | BHS |
| Erebidae    | Hypeninae    | <i>Hypena kengkalis</i>      | LJZ100813106 | KF797570 | LJZ |
| Erebidae    | Hypeninae    | <i>Hypena tristalis</i>      | BHS100704002 | KF797572 | BHS |
| Erebidae    | Hypeninae    | <i>Hypena tristalis</i>      | BHS100705023 | KF797573 | BHS |
| Erebidae    | Hypeninae    | <i>Hypena tristalis</i>      | BHS100705066 | KF797574 | BHS |
| Erebidae    | Hypeninae    | <i>Hypena tristalis</i>      | LJZ100726556 | KF797575 | LJZ |
| Erebidae    | Hypeninae    | <i>Hypena tristalis</i>      | WLS100722349 | KF797571 | WLS |
| Erebidae    | Herminiinae  | <i>Paracolax tristalis</i>   | DLS100714070 | KJ183446 | DLS |
| Erebidae    | Herminiinae  | <i>Paracolax tristalis</i>   | DLS100714232 | KJ183447 | DLS |
| Erebidae    | Herminiinae  | <i>Paracolax tristalis</i>   | DLS100714263 | KJ183448 | DLS |
| Erebidae    | Herminiinae  | <i>Paracolax tristalis</i>   | DLS100714290 | KJ183449 | DLS |
| Erebidae    | Herminiinae  | <i>Zanclognatha lunalis</i>  | DLS100714088 | KJ183450 | DLS |
| Erebidae    | Herminiinae  | <i>Zanclognatha lunalis</i>  | DLS100714142 | KJ183451 | DLS |
| Erebidae    | Herminiinae  | <i>Zanclognatha lunalis</i>  | DLS100714187 | KJ183452 | DLS |
| Erebidae    | Herminiinae  | <i>Zanclognatha lunalis</i>  | DLS100714316 | KJ183453 | DLS |
| Erebidae    | Herminiinae  | <i>Zanclognatha lunalis</i>  | DLS100714349 | KJ183454 | DLS |
| Erebidae    | Herminiinae  | <i>Simplicia sp.</i>         | DLS100714155 | KJ183487 | DLS |
| Erebidae    | Pangraptinae | <i>Pangrapta disruptalis</i> | DLS100714091 | KJ183465 | DLS |
| Erebidae    | Pangraptinae | <i>Pangrapta disruptalis</i> | DLS100714136 | KJ183466 | DLS |
| Erebidae    | Pangraptinae | <i>Pangrapta lunulata</i>    | DLS100714296 | KJ183467 | DLS |
| Erebidae    | Pangraptinae | <i>Pangrapta sp.</i>         | DLS100714164 | KJ183468 | DLS |
| Geometridae | Ennominae    | <i>Abraxas sp</i>            | DLS100714024 | KJ183225 | DLS |
| Geometridae | Ennominae    | <i>Abraxas sp</i>            | DLS100714025 | KJ183226 | DLS |
| Geometridae | Ennominae    | <i>Abraxas sp</i>            | DLS100714026 | KJ183227 | DLS |
| Geometridae | Ennominae    | <i>Abraxas sp</i>            | DLS100714027 | KJ183228 | DLS |
| Geometridae | Ennominae    | <i>Abraxas sp</i>            | DLS100714028 | KJ183229 | DLS |

|             |           |                                    |              |          |     |
|-------------|-----------|------------------------------------|--------------|----------|-----|
| Geometridae | Ennominae | <i>Abraxas sp</i>                  | DLS100714029 | KJ183230 | DLS |
| Geometridae | Ennominae | <i>Abraxas sp</i>                  | DLS100714030 | KJ183231 | DLS |
| Geometridae | Ennominae | <i>Abraxas sp</i>                  | DLS100714031 | KJ183232 | DLS |
| Geometridae | Ennominae | <i>Abraxas sp</i>                  | DLS100714032 | KJ183233 | DLS |
| Geometridae | Ennominae | <i>Abraxas sp</i>                  | DLS100714033 | KJ183234 | DLS |
| Geometridae | Ennominae | <i>Amraica confusa</i>             | DLS100714056 | KJ183235 | DLS |
| Geometridae | Ennominae | <i>Amraica confusa</i>             | DLS100714074 | KJ183236 | DLS |
| Geometridae | Ennominae | <i>Amraica confusa</i>             | DLS100714274 | KJ183237 | DLS |
| Geometridae | Ennominae | <i>Arichanna melanariafraterna</i> | DLS100714012 | KJ183238 | DLS |
| Geometridae | Ennominae | <i>Arichanna melanariafraterna</i> | DLS100714014 | KJ183239 | DLS |
| Geometridae | Ennominae | <i>Arichanna melanariafraterna</i> | DLS100714018 | KJ183240 | DLS |
| Geometridae | Ennominae | <i>Arichanna melanariafraterna</i> | DLS100714023 | KJ183241 | DLS |
| Geometridae | Ennominae | <i>Arichanna sinica</i>            | DLS100714013 | KJ183242 | DLS |
| Geometridae | Ennominae | <i>Arichanna sinica</i>            | DLS100714015 | KJ183243 | DLS |
| Geometridae | Ennominae | <i>Arichanna sinica</i>            | DLS100714016 | KJ183244 | DLS |
| Geometridae | Ennominae | <i>Arichanna sinica</i>            | DLS100714017 | KJ183245 | DLS |
| Geometridae | Ennominae | <i>Arichanna sinica</i>            | DLS100714019 | KJ183246 | DLS |
| Geometridae | Ennominae | <i>Arichanna sinica</i>            | DLS100714021 | KJ183248 | DLS |
| Geometridae | Ennominae | <i>Arichanna sinica</i>            | DLS100714022 | KJ183249 | DLS |
| Geometridae | Ennominae | <i>Arichanna sinica</i>            | DLS100714020 | KJ183247 | DLS |
| Geometridae | Ennominae | <i>Ascotis dianaria</i>            | DLS100714035 | KJ183251 | DLS |
| Geometridae | Ennominae | <i>Ascotis dianaria</i>            | DLS100714039 | KJ183253 | DLS |
| Geometridae | Ennominae | <i>Ascotis dianaria</i>            | DLS100714040 | KJ183254 | DLS |
| Geometridae | Ennominae | <i>Ascotis dianaria</i>            | DLS100714046 | KJ183256 | DLS |
| Geometridae | Ennominae | <i>Ascotis dianaria</i>            | DLS100714068 | KJ183250 | DLS |
| Geometridae | Ennominae | <i>Ascotis dianaria</i>            | DLS100714215 | KJ183258 | DLS |
| Geometridae | Ennominae | <i>Ascotis dianaria</i>            | DLS100714297 | KJ183260 | DLS |
| Geometridae | Ennominae | <i>Ascotis selenaria</i>           | DLS100714036 | KJ183252 | DLS |
| Geometridae | Ennominae | <i>Ascotis selenaria</i>           | DLS100714042 | KJ183255 | DLS |
| Geometridae | Ennominae | <i>Ascotis selenaria</i>           | DLS100714061 | KJ183257 | DLS |
| Geometridae | Ennominae | <i>Ascotis selenaria</i>           | DLS100714249 | KJ183259 | DLS |
| Geometridae | Ennominae | <i>Biston betularia</i>            | DLS100714038 | KJ183261 | DLS |
| Geometridae | Ennominae | <i>Biston betularia</i>            | DLS100714120 | KJ183262 | DLS |
| Geometridae | Ennominae | <i>Biston betularia</i>            | DLS100714121 | KJ183263 | DLS |
| Geometridae | Ennominae | <i>Biston thoracicaria</i>         | DLS100714086 | KJ183264 | DLS |
| Geometridae | Ennominae | <i>Biston thoracicaria</i>         | DLS100714103 | KJ183265 | DLS |
| Geometridae | Ennominae | <i>Biston thoracicaria</i>         | DLS100714171 | KJ183266 | DLS |
| Geometridae | Ennominae | <i>Biston thoracicaria</i>         | DLS100714185 | KJ183267 | DLS |
| Geometridae | Ennominae | <i>Biston thoracicaria</i>         | DLS100714271 | KJ183268 | DLS |
| Geometridae | Ennominae | <i>Biston thoracicaria</i>         | DLS100714294 | KJ183269 | DLS |
| Geometridae | Ennominae | <i>Biston thoracicaria</i>         | DLS100714330 | KJ183270 | DLS |
| Geometridae | Ennominae | <i>Cabera sp</i>                   | DLS100714224 | KJ183271 | DLS |
| Geometridae | Ennominae | <i>Chiasmia hebesata</i>           | DLS100714320 | KJ183273 | DLS |
| Geometridae | Ennominae | <i>Ectropis excellens</i>          | DLS100714235 | KJ183276 | DLS |

|             |               |                                      |              |          |     |
|-------------|---------------|--------------------------------------|--------------|----------|-----|
| Geometridae | Ennominae     | <i>Ennomos quercaria</i>             | DLS100714293 | KJ183277 | DLS |
| Geometridae | Ennominae     | <i>Hypomecis punctinalis</i>         | DLS100714047 | KJ183285 | DLS |
| Geometridae | Ennominae     | <i>Hypomecis sp1</i>                 | DLS100714037 | KJ183286 | DLS |
| Geometridae | Ennominae     | <i>Hypomecis sp1</i>                 | DLS100714044 | KJ183287 | DLS |
| Geometridae | Ennominae     | <i>Hypomecis sp1</i>                 | DLS100714138 | KJ183288 | DLS |
| Geometridae | Ennominae     | <i>Hypomecis sp1</i>                 | DLS100714239 | KJ183289 | DLS |
| Geometridae | Ennominae     | <i>Hypomecis sp1</i>                 | DLS100714245 | KJ183290 | DLS |
| Geometridae | Ennominae     | <i>Hypomecis sp1</i>                 | DLS100714298 | KJ183291 | DLS |
| Geometridae | Ennominae     | <i>Hypomecis sp1</i>                 | DLS100714304 | KJ183292 | DLS |
| Geometridae | Ennominae     | <i>Hypomecis sp1</i>                 | DLS100714345 | KJ183293 | DLS |
| Geometridae | Ennominae     | <i>Hypomecis sp2</i>                 | DLS100714343 | KJ183294 | DLS |
| Geometridae | Ennominae     | <i>Hypoxystis pluviana</i>           | DLS100714322 | KJ183295 | DLS |
| Geometridae | Ennominae     | <i>Jankowskia athleta</i>            | DLS100714188 | KJ183296 | DLS |
| Geometridae | Ennominae     | <i>Jankowskia sp</i>                 | DLS100714112 | KJ183297 | DLS |
| Geometridae | Ennominae     | <i>Jankowskia sp</i>                 | DLS100714151 | KJ183298 | DLS |
| Geometridae | Ennominae     | <i>Jankowskia sp</i>                 | DLS100714182 | KJ183299 | DLS |
| Geometridae | Ennominae     | <i>Jankowskia sp</i>                 | DLS100714205 | KJ183300 | DLS |
| Geometridae | Ennominae     | <i>Ophthalmitis albosignaria</i>     | DLS100714001 | KJ183305 | DLS |
| Geometridae | Ennominae     | <i>Ophthalmitis albosignaria</i>     | DLS100714002 | KJ183306 | DLS |
| Geometridae | Ennominae     | <i>Ophthalmitis albosignaria</i>     | DLS100714003 | KJ183307 | DLS |
| Geometridae | Ennominae     | <i>Ophthalmitis albosignaria</i>     | DLS100714004 | KJ183308 | DLS |
| Geometridae | Ennominae     | <i>Ophthalmitis irrorataria</i>      | DLS100714041 | KJ183309 | DLS |
| Geometridae | Ennominae     | <i>Ophthalmitis irrorataria</i>      | DLS100714043 | KJ183310 | DLS |
| Geometridae | Ennominae     | <i>Ophthalmitis irrorataria</i>      | DLS100714206 | KJ183311 | DLS |
| Geometridae | Ennominae     | <i>Phthonandria emaria</i>           | DLS100714199 | KJ183312 | DLS |
| Geometridae | Ennominae     | <i>Phthonandria emaria</i>           | DLS100714289 | KJ183313 | DLS |
| Geometridae | Ennominae     | <i>Phthonandria emaria</i>           | DLS100714323 | KJ183314 | DLS |
| Geometridae | Ennominae     | <i>Selenia sordidaria</i>            | DLS100714150 | KJ183326 | DLS |
| Geometridae | Geometrinae   | <i>Chlorissa obliterata</i>          | DLS100714211 | KJ183274 | DLS |
| Geometridae | Geometrinae   | <i>Comibaena procumbaria</i>         | DLS100714338 | KJ183275 | DLS |
| Geometridae | Geometrinae   | <i>Hemistola veneta</i>              | DLS100714048 | KJ183283 | DLS |
| Geometridae | Geometrinae   | <i>Hemistola veneta</i>              | DLS100714209 | KJ183284 | DLS |
| Geometridae | Geometrinae   | <i>Maxates sp</i>                    | DLS100714085 | KJ183301 | DLS |
| Geometridae | Geometrinae   | <i>Maxates sp</i>                    | DLS100714282 | KJ183302 | DLS |
| Geometridae | Geometrinae   | <i>Victoria sp</i>                   | DLS100714285 | KJ183327 | DLS |
| Geometridae | Larentiinae   | <i>Chartographa sp</i>               | DLS100714268 | KJ183272 | DLS |
| Geometridae | Larentiinae   | <i>Eupithecia abietariagigantean</i> | DLS100714119 | KJ183278 | DLS |
| Geometridae | Larentiinae   | <i>Eupithecia abietariagigantean</i> | DLS100714203 | KJ183279 | DLS |
| Geometridae | Larentiinae   | <i>Eupithecia abietariagigantean</i> | DLS100714212 | KJ183280 | DLS |
| Geometridae | Larentiinae   | <i>Eupithecia abietariagigantean</i> | DLS100714226 | KJ183281 | DLS |
| Geometridae | Larentiinae   | <i>Eupithecia abietariagigantean</i> | DLS100714306 | KJ183282 | DLS |
| Geometridae | Larentiinae   | <i>Melanthia sp</i>                  | DLS100714210 | KJ183303 | DLS |
| Geometridae | Orthostixinae | <i>Naxa seriaria</i>                 | DLS100714071 | KJ183304 | DLS |
| Geometridae | Sterrhinae    | <i>Problepsis changmei</i>           | DLS100714005 | KJ183315 | DLS |

|               |              |                                    |              |          |     |
|---------------|--------------|------------------------------------|--------------|----------|-----|
| Geometridae   | Sterrhinae   | <i>Problepsis changmei</i>         | DLS100714006 | KJ183316 | DLS |
| Geometridae   | Sterrhinae   | <i>Problepsis changmei</i>         | DLS100714007 | KJ183317 | DLS |
| Geometridae   | Sterrhinae   | <i>Problepsis changmei</i>         | DLS100714008 | KJ183318 | DLS |
| Geometridae   | Sterrhinae   | <i>Problepsis changmei</i>         | DLS100714009 | KJ183319 | DLS |
| Geometridae   | Sterrhinae   | <i>Problepsis changmei</i>         | DLS100714010 | KJ183320 | DLS |
| Geometridae   | Sterrhinae   | <i>Problepsis changmei</i>         | DLS100714011 | KJ183321 | DLS |
| Geometridae   | Sterrhinae   | <i>Problepsis changmei</i>         | DLS100714122 | KJ183322 | DLS |
| Geometridae   | Sterrhinae   | <i>Scopula subpunctaria</i>        | DLS100714278 | KJ183323 | DLS |
| Geometridae   | Sterrhinae   | <i>Scopula subpunctaria</i>        | DLS100714307 | KJ183324 | DLS |
| Geometridae   | Sterrhinae   | <i>Scopula sp1</i>                 | DLS100714202 | KJ183325 | DLS |
| Geometridae   | UNKNOW       | <i>Iridopsis larvaria</i>          | DLS100714280 | MH122658 | DLS |
| Lasiocampidae | Pinarinae    | <i>Gastropacha sikkima</i>         | DLS100714267 | KJ183386 | DLS |
| Limacodidae   | UNKNOW       | <i>Chalcoscelides castaneipars</i> | DLS100714098 | KJ183328 | DLS |
| Limacodidae   | Limacodinae  | <i>Monema flavescens</i>           | DLS100714264 | KJ183329 | DLS |
| Limacodidae   | Limacodinae  | <i>Narosoideus flavidorsalis</i>   | DLS100714170 | KJ183330 | DLS |
| Limacodidae   | Limacodinae  | <i>Narosoideus flavidorsalis</i>   | DLS100714242 | KJ183331 | DLS |
| Limacodidae   | Limacodinae  | <i>Narosoideus flavidorsalis</i>   | DLS100714272 | KJ183332 | DLS |
| Limacodidae   | Limacodinae  | <i>Narosoideus flavidorsalis</i>   | DLS100714276 | KJ183333 | DLS |
| Limacodidae   | Limacodinae  | <i>Narosoideus flavidorsalis</i>   | DLS100714310 | KJ183334 | DLS |
| Limacodidae   | Limacodinae  | <i>Narosoideus flavidorsalis</i>   | DLS100714333 | KJ183335 | DLS |
| Limacodidae   | Limacodinae  | <i>Parasa consocia</i>             | DLS100714059 | KJ183336 | DLS |
| Limacodidae   | Limacodinae  | <i>Parasa consocia</i>             | DLS100714063 | KJ183337 | DLS |
| Limacodidae   | Limacodinae  | <i>Parasa consocia</i>             | DLS100714064 | KJ183338 | DLS |
| Limacodidae   | Limacodinae  | <i>Parasa consocia</i>             | DLS100714100 | KJ183339 | DLS |
| Limacodidae   | Limacodinae  | <i>Parasa consocia</i>             | DLS100714106 | KJ183340 | DLS |
| Limacodidae   | Limacodinae  | <i>Parasa consocia</i>             | DLS100714143 | KJ183341 | DLS |
| Limacodidae   | Limacodinae  | <i>Parasa consocia</i>             | DLS100714161 | KJ183342 | DLS |
| Limacodidae   | Limacodinae  | <i>Parasa consocia</i>             | DLS100714172 | KJ183343 | DLS |
| Limacodidae   | Limacodinae  | <i>Parasa consocia</i>             | DLS100714184 | KJ183344 | DLS |
| Limacodidae   | Limacodinae  | <i>Parasa consocia</i>             | DLS100714186 | KJ183345 | DLS |
| Limacodidae   | Limacodinae  | <i>Parasa consocia</i>             | DLS100714219 | KJ183346 | DLS |
| Limacodidae   | Limacodinae  | <i>Parasa consocia</i>             | DLS100714223 | KJ183347 | DLS |
| Limacodidae   | Limacodinae  | <i>Parasa consocia</i>             | DLS100714241 | KJ183348 | DLS |
| Limacodidae   | Limacodinae  | <i>Parasa consocia</i>             | DLS100714270 | KJ183349 | DLS |
| Limacodidae   | Limacodinae  | <i>Parasa consocia</i>             | DLS100714286 | KJ183350 | DLS |
| Limacodidae   | Limacodinae  | <i>Parasa consocia</i>             | DLS100714313 | KJ183351 | DLS |
| Limacodidae   | Limacodinae  | <i>Parasa consocia</i>             | DLS100714324 | KJ183352 | DLS |
| Limacodidae   | Limacodinae  | <i>Parasa consocia</i>             | DLS100714325 | KJ183353 | DLS |
| Limacodidae   | Limacodinae  | <i>Parasa consocia</i>             | DLS100714348 | KJ183354 | DLS |
| Limacodidae   | Limacodinae  | <i>Thosea sinensis</i>             | DLS100714114 | KJ183355 | DLS |
| Limacodidae   | Limacodinae  | <i>Thosea sinensis</i>             | DLS100714116 | KJ183356 | DLS |
| Limacodidae   | Limacodinae  | <i>Thosea sinensis</i>             | DLS100714135 | KJ183357 | DLS |
| Limacodidae   | Limacodinae  | <i>Thosea sinensis</i>             | DLS100714149 | KJ183358 | DLS |
| Noctuidae     | Acronictinae | <i>Acronicta rumicis</i>           | DLS100714254 | KJ183408 | DLS |

|           |              |                              |              |          |     |
|-----------|--------------|------------------------------|--------------|----------|-----|
| Noctuidae | Acronictinae | <i>Acronicta rumicis</i>     | DLS100714258 | KJ183409 | DLS |
| Noctuidae | Acronictinae | <i>Acronicta intermedia</i>  | DLS100714318 | KJ183411 | DLS |
| Noctuidae | Acronictinae | <i>Acronicta intermedia</i>  | DLS100714160 | KJ183410 | DLS |
| Noctuidae | Acronictinae | <i>Acronicta major</i>       | DLS100714084 | KJ183412 | DLS |
| Noctuidae | Acronictinae | <i>Acronicta major</i>       | DLS100714250 | KJ183413 | DLS |
| Noctuidae | Acronictinae | <i>Acronicta major</i>       | DLS100714301 | KJ183414 | DLS |
| Noctuidae | Amphipyridae | <i>Prospalta cyclica</i>     | DLS100714080 | KJ183482 | DLS |
| Noctuidae | Amphipyridae | <i>Prospalta cyclica</i>     | DLS100714125 | KJ183483 | DLS |
| Noctuidae | Amphipyridae | <i>Prospalta cyclica</i>     | DLS100714129 | KJ183484 | DLS |
| Noctuidae | Amphipyridae | <i>Prospalta cyclica</i>     | DLS100714341 | KJ183485 | DLS |
| Noctuidae | Bagisariinae | <i>Sphragifera sigillata</i> | DLS100714034 | KJ183415 | DLS |
| Noctuidae | Catocalinae  | <i>Catocala fulminea</i>     | DLS100714082 | KJ183416 | DLS |
| Noctuidae | Catocalinae  | <i>Catocala fulminea</i>     | DLS100714104 | KJ183417 | DLS |
| Noctuidae | Catocalinae  | <i>Catocala fulminea</i>     | DLS100714311 | KJ183418 | DLS |
| Noctuidae | Hadeninae    | <i>Acosmetia chinensis</i>   | DLS100714087 | KJ183422 | DLS |
| Noctuidae | Cuculliinae  | <i>Cucullia fraudatrix</i>   | DLS100714137 | KJ183423 | DLS |
| Noctuidae | Cuculliinae  | <i>Cucullia fuchsiana</i>    | DLS100714248 | KJ183424 | DLS |
| Noctuidae | Cuculliinae  | <i>Cucullia umbratica</i>    | DLS100714192 | KJ183425 | DLS |
| Noctuidae | Hadeninae    | <i>Acosmetia biguttula</i>   | DLS100714078 | KJ183419 | DLS |
| Noctuidae | Hadeninae    | <i>Acosmetia biguttula</i>   | DLS100714145 | KJ183420 | DLS |
| Noctuidae | Hadeninae    | <i>Acosmetia biguttula</i>   | DLS100714291 | KJ183421 | DLS |
| Noctuidae | Hadeninae    | <i>Lacanobia aliena</i>      | DLS100714069 | KJ183427 | DLS |
| Noctuidae | Hadeninae    | <i>Lacanobia aliena</i>      | DLS100714099 | KJ183428 | DLS |
| Noctuidae | Hadeninae    | <i>Lacanobia aliena</i>      | DLS100714101 | KJ183429 | DLS |
| Noctuidae | Hadeninae    | <i>Lacanobia aliena</i>      | DLS100714132 | KJ183430 | DLS |
| Noctuidae | Hadeninae    | <i>Lacanobia aliena</i>      | DLS100714133 | KJ183431 | DLS |
| Noctuidae | Hadeninae    | <i>Lacanobia aliena</i>      | DLS100714141 | KJ183432 | DLS |
| Noctuidae | Hadeninae    | <i>Lacanobia aliena</i>      | DLS100714146 | KJ183433 | DLS |
| Noctuidae | Hadeninae    | <i>Lacanobia aliena</i>      | DLS100714163 | KJ183434 | DLS |
| Noctuidae | Hadeninae    | <i>Lacanobia aliena</i>      | DLS100714189 | KJ183435 | DLS |
| Noctuidae | Hadeninae    | <i>Lacanobia aliena</i>      | DLS100714191 | KJ183436 | DLS |
| Noctuidae | Hadeninae    | <i>Lacanobia aliena</i>      | DLS100714195 | KJ183437 | DLS |
| Noctuidae | Hadeninae    | <i>Lacanobia aliena</i>      | DLS100714228 | KJ183438 | DLS |
| Noctuidae | Hadeninae    | <i>Lacanobia aliena</i>      | DLS100714230 | KJ183439 | DLS |
| Noctuidae | Hadeninae    | <i>Lacanobia aliena</i>      | DLS100714238 | KJ183440 | DLS |
| Noctuidae | Hadeninae    | <i>Lacanobia aliena</i>      | DLS100714327 | KJ183441 | DLS |
| Noctuidae | Hadeninae    | <i>Sideridis sp</i>          | DLS100714094 | KJ183442 | DLS |
| Noctuidae | Heliiothinae | <i>Raphia peustera</i>       | DLS100714152 | KJ183443 | DLS |
| Noctuidae | Heliiothinae | <i>Raphia peustera</i>       | DLS100714262 | KJ183444 | DLS |
| Noctuidae | Heliiothinae | <i>Schinia scutosa</i>       | DLS100714277 | KJ183445 | DLS |
| Noctuidae | Unknow       | <i>Lophomilia polybapta</i>  | DLS100714115 | KJ183479 | DLS |
| Noctuidae | Unknow       | <i>Lophomilia polybapta</i>  | DLS100714275 | KJ183480 | DLS |
| Noctuidae | Noctuinae    | <i>Athetis pallidipennis</i> | DLS100714077 | KJ183455 | DLS |
| Noctuidae | Noctuinae    | <i>Eugraphe sigma</i>        | DLS100714057 | KJ183471 | DLS |

|              |                |                                       |              |          |     |
|--------------|----------------|---------------------------------------|--------------|----------|-----|
| Noctuidae    | Noctuinae      | <i>Eugraphe sigma</i>                 | DLS100714216 | KJ183472 | DLS |
| Noctuidae    | Noctuinae      | <i>Eugraphe sigma</i>                 | DLS100714283 | KJ183473 | DLS |
| Noctuidae    | Noctuinae      | <i>Lasionycta contigua</i>            | DLS100714090 | KJ183456 | DLS |
| Noctuidae    | Noctuinae      | <i>Mythimna monticola</i>             | DLS100714107 | KJ183457 | DLS |
| Noctuidae    | Noctuinae      | <i>Mythimna monticola</i>             | DLS100714118 | KJ183458 | DLS |
| Noctuidae    | Noctuinae      | <i>Mythimna monticola</i>             | DLS100714134 | KJ183459 | DLS |
| Noctuidae    | Noctuinae      | <i>Mythimna monticola</i>             | DLS100714234 | KJ183460 | DLS |
| Noctuidae    | Noctuinae      | <i>Mythimna monticola</i>             | DLS100714344 | KJ183461 | DLS |
| Noctuidae    | Noctuinae      | <i>Mythimna monticola</i>             | DLS100714236 | KJ183462 | DLS |
| Noctuidae    | Noctuinae      | <i>Mythimna velutina</i>              | DLS100714097 | KJ183463 | DLS |
| Noctuidae    | Ophiderinae    | <i>Chrysothrum amata</i>              | DLS100714332 | KJ183464 | DLS |
| Noctuidae    | Ophiderinae    | <i>Scoliopteryx libatrix</i>          | DLS100714303 | KJ183486 | DLS |
| Noctuidae    | Thiacidinae    | <i>Panthauma egregia</i>              | DLS100714221 | KJ183481 | DLS |
| Noctuidae    | Xyleninae      | <i>Eucarta arcta</i>                  | DLS100714165 | KJ183469 | DLS |
| Noctuidae    | Xyleninae      | <i>Eucarta arcta</i>                  | DLS100714337 | KJ183470 | DLS |
| Noctuidae    | Nolinae        | <i>Iragaodes nobilis</i>              | DLS100714317 | KJ183478 | DLS |
| Noctuidae    | Psaphidinae    | <i>Flexivaleria mienshani</i>         | DLS100714147 | KJ183474 | DLS |
| Noctuidae    | Psaphidinae    | <i>Flexivaleria mienshani</i>         | DLS100714180 | KJ183475 | DLS |
| Noctuidae    | Psaphidinae    | <i>Flexivaleria mienshani</i>         | DLS100714190 | KJ183476 | DLS |
| Noctuidae    | Psaphidinae    | <i>Flexivaleria mienshani</i>         | DLS100714299 | KJ183477 | DLS |
| Notodontidae | Dicranurinae   | <i>Wilemanus bidentatus</i>           | DLS100714073 | KJ183502 | DLS |
| Notodontidae | Dicranurinae   | <i>Wilemanus bidentatus</i>           | DLS100714126 | KJ183503 | DLS |
| Notodontidae | Dicranurinae   | <i>Wilemanus bidentatus</i>           | DLS100714269 | KJ183504 | DLS |
| Notodontidae | Dicranurinae   | <i>Wilemanus bidentatus</i>           | DLS100714256 | KJ183505 | DLS |
| Notodontidae | Dudusinae      | <i>Euhampsonia cristata</i>           | DLS100714109 | KF797580 | DLS |
| Notodontidae | Dudusinae      | <i>Euhampsonia splendida</i>          | DLS100714162 | KJ183506 | DLS |
| Notodontidae | Heterocampinae | <i>Stauropus basalis</i>              | DLS100714066 | KF797581 | DLS |
| Notodontidae | Heterocampinae | <i>Stauropus basalis</i>              | DLS100714300 | KF797582 | DLS |
| Notodontidae | Notodontinae   | <i>Gluphisia crenata meridionalis</i> | DLS100714183 | KF797583 | DLS |
| Notodontidae | Notodontinae   | <i>Nerice hoenei</i>                  | DLS100714246 | KJ183507 | DLS |
| Notodontidae | Phalerinae     | <i>Rachiades lichenicolor murzini</i> | DLS100714237 | KJ183508 | DLS |
| Notodontidae | Phalerinae     | <i>Peridea lativitta</i>              | DLS100714251 | KF797584 | DLS |
| Notodontidae | Phalerinae     | <i>Phalera flavescens</i>             | DLS100714108 | KF797585 | DLS |
| Notodontidae | Phalerinae     | <i>Clostera albosig macurtuloides</i> | DLS100714072 | KJ183509 | DLS |
| Notodontidae | Phalerinae     | <i>Clostera albosig macurtuloides</i> | DLS100714312 | KJ183510 | DLS |
| Notodontidae | Ptilodoninae   | <i>Hagapteryx mirabilior</i>          | DLS100714339 | KF797586 | DLS |
| Notodontidae | Stauropinae    | <i>Fentonia ocypete</i>               | DLS100714217 | KF797587 | DLS |
| Sphingidae   | Macroglossinae | <i>Ampelophaga rubiginosa</i>         | DLS100714353 | KJ183361 | DLS |
| Sphingidae   | Macroglossinae | <i>Deilephila askoldensis</i>         | DLS100714065 | KJ183362 | DLS |
| Sphingidae   | Smerinthinae   | <i>Callambulyx tatarinovi</i>         | DLS100714265 | KJ183363 | DLS |
| Sphingidae   | Smerinthinae   | <i>Dolbina paraexacta</i>             | DLS100714295 | KJ183364 | DLS |
| Sphingidae   | Smerinthinae   | <i>Dolbina paraexacta</i>             | DLS100714326 | KJ183365 | DLS |
| Thyatiridae  | Thyatirinae    | <i>Tethea albicostata</i>             | DLS100714058 | KJ183384 | DLS |
| Thyatiridae  | Thyatirinae    | <i>Tethea albicostata</i>             | DLS100714331 | KJ183385 | DLS |

|             |             |                        |              |          |     |
|-------------|-------------|------------------------|--------------|----------|-----|
| Thyatiridae | Thyatirinae | <i>Tethea ocularis</i> | DLS100714045 | KJ183359 | DLS |
| Thyatiridae | Thyatirinae | <i>Tethea ocularis</i> | DLS100714102 | KJ183360 | DLS |

---

DLS - Dongling mountain, BHS - Baihua mountain, WLS - Wuling mountain, LJZ - Longjiazhuang

**TableS5 Taxon information, detailed sampling sites and GenBank**

**accession numbers of *Hypena***

| Family          | Subfamily      | Species                               | Specimen ID  | COI      | COII     | 28S      | EF1-a    | Wgl      | Locality |
|-----------------|----------------|---------------------------------------|--------------|----------|----------|----------|----------|----------|----------|
| <b>Outgroup</b> |                |                                       |              |          |          |          |          |          |          |
| Notodontidae    | Dudusinae      | <i>Euhampsonia cristata</i>           | DLS100714109 | KF797580 | KF797643 | KF797517 | KF797706 | KF797769 | DLS      |
| Notodontidae    | Heterocampinae | <i>Stauropus basalis</i>              | DLS100714066 | KF797581 | KF797644 | KF797518 | KF797707 | KF797770 | DLS      |
| Notodontidae    | Heterocampinae | <i>Stauropus basalis</i>              | DLS100714300 | KF797582 | KF797645 | KF797519 | KF797708 | KF797771 | DLS      |
| Notodontidae    | Notodontinae   | <i>Gluphisia crenata meridionalis</i> | DLS100714183 | KF797583 | KF797646 | KF797520 | KF797709 | KF797772 | DLS      |
| Notodontidae    | Phalerinae     | <i>Peridea lativitta</i>              | DLS100714251 | KF797584 | KF797647 | KF797521 | KF797710 | KF797773 | DLS      |
| Notodontidae    | Phalerinae     | <i>Phalera flavescens</i>             | DLS100714108 | KF797585 | KF797648 | KF797522 | KF797711 | KF797774 | DLS      |
| Notodontidae    | Ptilodoninae   | <i>Hagapteryx mirabilior</i>          | DLS100714339 | KF797586 | KF797649 | KF797523 | KF797712 | KF797775 | DLS      |
| Notodontidae    | Stauropinae    | <i>Fentonia ocypete</i>               | DLS100714217 | KF797587 | KF797650 | KF797524 | KF797713 | KF797776 | DLS      |
| <b>Ingroup</b>  |                |                                       |              |          |          |          |          |          |          |
| Noctuidae       | Hypeninae      | <i>Hypena</i> sp.1                    | DLS100714062 | KF797525 | KF797588 | KF797462 | KF797651 | KF797714 | DLS      |
| Noctuidae       | Hypeninae      | <i>Hypena</i> sp.1                    | DLS100714076 | KF797526 | KF797589 | KF797463 | KF797652 | KF797715 | DLS      |
| Noctuidae       | Hypeninae      | <i>Hypena</i> sp.1                    | DLS100714079 | KF797527 | KF797590 | KF797464 | KF797653 | KF797716 | DLS      |
| Noctuidae       | Hypeninae      | <i>Hypena</i> sp.1                    | DLS100714081 | KF797528 | KF797591 | KF797465 | KF797654 | KF797717 | DLS      |
| Noctuidae       | Hypeninae      | <i>Hypena</i> sp.1                    | DLS100714089 | KF797529 | KF797592 | KF797466 | KF797655 | KF797718 | DLS      |
| Noctuidae       | Hypeninae      | <i>Hypena</i> sp.1                    | DLS100714096 | KF797530 | KF797593 | KF797467 | KF797656 | KF797719 | DLS      |
| Noctuidae       | Hypeninae      | <i>Hypena</i> sp.1                    | DLS100714105 | KF797531 | KF797594 | KF797468 | KF797657 | KF797720 | DLS      |
| Noctuidae       | Hypeninae      | <i>Hypena</i> sp.1                    | DLS100714110 | KF797532 | KF797595 | KF797469 | KF797658 | KF797721 | DLS      |
| Noctuidae       | Hypeninae      | <i>Hypena</i> sp.2                    | DLS100714111 | KF797533 | KF797596 | KF797470 | KF797659 | KF797722 | DLS      |
| Noctuidae       | Hypeninae      | <i>Hypena</i> sp.3                    | DLS100714117 | KF797534 | KF797597 | KF797471 | KF797660 | KF797723 | DLS      |
| Noctuidae       | Hypeninae      | <i>Hypena</i> sp.3                    | DLS100714131 | KF797535 | KF797598 | KF797472 | KF797661 | KF797724 | DLS      |
| Noctuidae       | Hypeninae      | <i>Hypena</i> sp.4                    | DLS100714123 | KF797536 | KF797599 | KF797473 | KF797662 | KF797725 | DLS      |
| Noctuidae       | Hypeninae      | <i>Hypena</i> sp.5                    | DLS100714128 | KF797537 | KF797600 | KF797474 | KF797663 | KF797726 | DLS      |
| Noctuidae       | Hypeninae      | <i>Hypena</i> sp.5                    | DLS100714144 | KF797538 | KF797601 | KF797475 | KF797664 | KF797727 | DLS      |
| Noctuidae       | Hypeninae      | <i>Hypena</i> sp.5                    | DLS100714154 | KF797539 | KF797602 | KF797476 | KF797665 | KF797728 | DLS      |
| Noctuidae       | Hypeninae      | <i>Hypena</i> sp.5                    | DLS100714169 | KF797540 | KF797603 | KF797477 | KF797666 | KF797729 | DLS      |
| Noctuidae       | Hypeninae      | <i>Hypena</i> sp.5                    | DLS100714179 | KF797541 | KF797604 | KF797478 | KF797667 | KF797730 | DLS      |
| Noctuidae       | Hypeninae      | <i>Hypena</i> sp.5                    | DLS100714181 | KF797542 | KF797605 | KF797479 | KF797668 | KF797731 | DLS      |
| Noctuidae       | Hypeninae      | <i>Hypena</i> sp.5                    | DLS100714207 | KF797543 | KF797606 | KF797480 | KF797669 | KF797732 | DLS      |
| Noctuidae       | Hypeninae      | <i>Hypena</i> sp.5                    | DLS100714208 | KF797544 | KF797607 | KF797481 | KF797670 | KF797733 | DLS      |
| Noctuidae       | Hypeninae      | <i>Hypena</i> sp.5                    | DLS100714214 | KF797545 | KF797608 | KF797482 | KF797671 | KF797734 | DLS      |
| Noctuidae       | Hypeninae      | <i>Hypena</i> sp.5                    | DLS100714231 | KF797546 | KF797609 | KF797483 | KF797672 | KF797735 | DLS      |
| Noctuidae       | Hypeninae      | <i>Hypena</i> sp.5                    | DLS100714244 | KF797547 | KF797610 | KF797484 | KF797673 | KF797736 | DLS      |
| Noctuidae       | Hypeninae      | <i>Hypena</i> sp.5                    | DLS100714247 | KF797548 | KF797611 | KF797485 | KF797674 | KF797737 | DLS      |



|           |           |                   |              |          |          |          |          |          |     |
|-----------|-----------|-------------------|--------------|----------|----------|----------|----------|----------|-----|
| Noctuidae | Hypeninae | Hypena sp.5       | DLS100714253 | KF797549 | KF797612 | KF797486 | KF797675 | KF797738 | DLS |
| Noctuidae | Hypeninae | Hypena sp.5       | DLS100714257 | KF797550 | KF797613 | KF797487 | KF797676 | KF797739 | DLS |
| Noctuidae | Hypeninae | Hypena sp.5       | DLS100714261 | KF797551 | KF797614 | KF797488 | KF797677 | KF797740 | DLS |
| Noctuidae | Hypeninae | Hypena sp.5       | DLS100714266 | KF797552 | KF797615 | KF797489 | KF797678 | KF797741 | DLS |
| Noctuidae | Hypeninae | Hypena sp.5       | DLS100714279 | KF797553 | KF797616 | KF797490 | KF797679 | KF797742 | DLS |
| Noctuidae | Hypeninae | Hypena sp.5       | DLS100714281 | KF797554 | KF797617 | KF797491 | KF797680 | KF797743 | DLS |
| Noctuidae | Hypeninae | Hypena sp.5       | DLS100714314 | KF797555 | KF797618 | KF797492 | KF797681 | KF797744 | DLS |
| Noctuidae | Hypeninae | Hypena sp.5       | DLS100714328 | KF797556 | KF797619 | KF797493 | KF797682 | KF797745 | DLS |
| Noctuidae | Hypeninae | Hypena sp.5       | DLS100714351 | KF797557 | KF797620 | KF797494 | KF797683 | KF797746 | DLS |
| Noctuidae | Hypeninae | Hypena sp.6       | DLS100714174 | KF797558 | KF797621 | KF797495 | KF797684 | KF797747 | DLS |
| Noctuidae | Hypeninae | Hypena sp.7       | DLS100714176 | KF797559 | KF797622 | KF797496 | KF797685 | KF797748 | DLS |
| Noctuidae | Hypeninae | Hypena sp.7       | DLS100714260 | KF797560 | KF797623 | KF797497 | KF797686 | KF797749 | DLS |
| Noctuidae | Hypeninae | Hypena squalida   | DLS100714083 | KF797561 | KF797624 | KF797498 | KF797687 | KF797750 | DLS |
| Noctuidae | Hypeninae | Hypena squalida   | DLS100714124 | KF797562 | KF797625 | KF797499 | KF797688 | KF797751 | DLS |
| Noctuidae | Hypeninae | Hypena squalida   | DLS100714148 | KF797563 | KF797626 | KF797500 | KF797689 | KF797752 | DLS |
| Noctuidae | Hypeninae | Hypena squalida   | DLS100714166 | KF797564 | KF797627 | KF797501 | KF797690 | KF797753 | DLS |
| Noctuidae | Hypeninae | Hypena squalida   | DLS100714173 | KF797565 | KF797628 | KF797502 | KF797691 | KF797754 | DLS |
| Noctuidae | Hypeninae | Hypena squalida   | DLS100714273 | KF797566 | KF797629 | KF797503 | KF797692 | KF797755 | DLS |
| Noctuidae | Hypeninae | Hypena squalida   | DLS100714334 | KF797567 | KF797630 | KF797504 | KF797693 | KF797756 | DLS |
| Noctuidae | Hypeninae | Hypena rivuligera | BHS100704018 | KF797579 | KF797642 | KF797505 | KF797704 | KF797768 | BHS |
| Noctuidae | Hypeninae | Hypena stygiana   | BHS100703072 | KF797576 | KF797639 | KF797506 | KF797702 | KF797765 | BHS |
| Noctuidae | Hypeninae | Hypena stygiana   | BHS100703246 | KF797577 | KF797640 | KF797507 | KF797703 | KF797766 | BHS |
| Noctuidae | Hypeninae | Hypena stygiana   | WLS100722081 | KF797578 | KF797641 | KF797508 | KF797705 | KF797767 | WLS |
| Noctuidae | Hypeninae | Hypena kengkalis  | BHS100703096 | KF797569 | KF797632 | KF797509 | KF797695 | KF797758 | BHS |
| Noctuidae | Hypeninae | Hypena kengkalis  | BHS100705124 | KF797568 | KF797631 | KF797510 | KF797694 | KF797757 | BHS |
| Noctuidae | Hypeninae | Hypena kengkalis  | LJZ100813106 | KF797570 | KF797633 | KF797511 | KF797696 | KF797759 | LJZ |
| Noctuidae | Hypeninae | Hypena tristalis  | BHS100704002 | KF797572 | KF797635 | KF797512 | KF797698 | KF797761 | BHS |
| Noctuidae | Hypeninae | Hypena tristalis  | BHS100705023 | KF797573 | KF797636 | KF797513 | KF797699 | KF797762 | BHS |
| Noctuidae | Hypeninae | Hypena tristalis  | BHS100705066 | KF797574 | KF797637 | KF797514 | KF797700 | KF797763 | BHS |
| Noctuidae | Hypeninae | Hypena tristalis  | LJZ100726556 | KF797575 | KF797638 | KF797515 | KF797701 | KF797764 | LJZ |
| Noctuidae | Hypeninae | Hypena tristalis  | WLS100722349 | KF797571 | KF797634 | KF797516 | KF797697 | KF797760 | WLS |

**DLS - Dongling mountain, BHS - Baihua mountain, WLS - Wuling mountain, LJZ - Longjiazhuang**
